# Supplementary material for: Characterization of the diverse plasmid pool harbored by the blaNDM-1-containing Acinetobacter bereziniae HPC229 clinical strain
Source: PubMed Central journal article supplement (PMC6863613; doi:10.1371/journal.pone.0220584), 2019-11-19
Supplement: pone.0220584.s002.pdf [file pone.0220584.s002.pdf]

**Table S1. Oligonucleotide primers used for PCR analysis**

| Plasmid     | Primer pairs <sup>a</sup> | Hybridization region in each plasmid | Sequence (5'→3') | Expected product size (bp) | Accession number |            |
|-------------|---------------------------|--------------------------------------|------------------|----------------------------|------------------|------------|
| pAbe229-114 | A                         | 91-F                                 | 59,292-59,312    | CTGCATGTACAAACTGTTTAC      | 947              | CM012183.1 |
|             |                           | 37-R                                 | 60,235-60,254    | GATCCACGCATAGATACAGG       |                  |            |
|             | B                         | 29-F                                 | 56,035-56,054    | TGGATTATGAGCACCCTAAG       | 1,178            |            |
|             |                           | 91-R                                 | 57,213-57,232    | TATGTCCAACCGCATAAAGG       |                  |            |
|             | C                         | mob114-F                             | 100,329-100,349  | GATCAATCGGCTTTGTATGCG      | 2,682            |            |
|             |                           | mob114-R                             | 102,991-103,010  | CAGCACACATCATCTGACC        |                  |            |
| pAbe229-15  | D                         | 76-F1                                | 10,460-10,478    | GCTGGTGATACTGAAGAAG        | 1,017            | CM012184.1 |
|             |                           | 80-R1                                | 11,458-11,476    | GGTTAGAGAGCCAGAGTTG        |                  |            |
|             | E                         | 80-F2                                | 1,861-1,880      | CAGGATATAGCAACGGATCC       | 1,236            |            |
|             |                           | 76-R2                                | 3,094-3,112      | CTCTCCCTGCACTCAATAG        |                  |            |
|             | F                         | mob15-F                              | 12,942-12,961    | CATGTGTGCAAGCACAAGCG       | 2,803            |            |
|             |                           | mob15-R                              | 336-355          | GAAAGGCTTGCTCCATAAGG       |                  |            |
| pAbe229-9   | G                         | 75-F                                 | 2,107-2,126      | CGTGGAACGTGAATAGTCAC       | 1,053            | CM012186.1 |
|             |                           | 75-R                                 | 3,140-3,159      | CTATCGTGGTGATGCTGAAC       |                  |            |
|             | H                         | mob9-F                               | 6,644-6,663      | GACCATCCCCATTCATAGCC       | 2,562            |            |
|             |                           | mob9-R                               | 32-52            | AGCGGTTTTTCAGAGGGCTG       |                  |            |
| pAbe229-4   | I                         | 82-F                                 | 3,903-3,921      | CAGCTAGCTCCAAGTAGTG        | 1,013            | CM012185.1 |
|             |                           | 82-R                                 | 446-465          | CATCTTAGATCGAGCTTTGC       |                  |            |
| pAbe229-1   | J                         | 95-F                                 | 673-692          | CGTAGTGATGCCTTACATTG       | 959              | CM012182.1 |
|             |                           | 95-R                                 | 284-302          | GCAGGCTACATAACTTTCG        |                  |            |

<sup>a</sup>Specific primers designed for HPC229 plasmids.
