# Supplementary material for: Characterization of the diverse plasmid pool harbored by the blaNDM-1-containing Acinetobacter bereziniae HPC229 clinical strain
Source: PLoS One. 2019 Nov 19;14(11):e0220584. doi: 10.1371/journal.pone.0220584 (PMC6863613; doi:10.1371/journal.pone.0220584)
Supplement: S2 Table — (XLSX) [file pone.0220584.s003.xlsx]

## Sheet: pAbe229-114
S2 Table. Genes codified in HPC229 plasmids
Order	Gene/Feature	Location (nucleotide)		DNA strand	Closest BlastP-match in NCBI databases
					Assigned function	Microorganism and/or plasmid	Subject protein
		Start	Stop				Length (amino acid residues)	Amino acid identitya (accession number)
1	repB	354	1.526	+	Initiator replication protein	A. ursingii UMB1319, A. nosocomialis 2010S01-197	390	100% (WP_043972782.1)
2	orf2	2.643	1.795	-	Hypothetical protein	A. ursingii UMB1319	282	100% (PMC95989.1)
3	orf3	2.745	2.924	+	Hypothetical protein	A. ursingii UMB1319	59	100% (PMC95988.1)
4	orf4	3.213	4.361	+	Hypothetical protein	A. ursingii UMB1319	382	100% (PMC95987.1)
5	tnpA	5.302	4.373	-	Mobile element protein	A. ursingii UMB1319	309	100% (PMC95986.1)
6	orf6	5.331	5.507	+	Hypothetical protein	A. johnsonii S2_018_000_R3_109	57	93% (PZO89185.1)
7	orf7	6.059	5.721	-	Hypothetical protein	A. ursingii UMB1319, A. johnsonii S2_018_000_R3_109	112	100% ( WP_058971435.1)
8	orf8	6.882	6.55	-	Transcriptional regulator, XRE family	A. ursingii UMB1319, A. johnsonii S2_018_000_R3_109	110	100% (WP_058971433.1)
9	ΔtnpA	6.914	7.255	+	Mobile element protein	A. baumannii WC-A-92	124	99% (ELW85486.1)
10	cadR-like	8.27	7.878	-	Transcriptional regulator CadR-like	Acinetobacter spp.	130	100% (WP_004281856.1)
11	cadA-like	8.349	9.641	+	Cobalt-zinc-cadmium resistance protein	A. radioresistens SH164	430	99% (EEY85464.1)
12	feoA	9.653	9.91	+	Ferrous iron transport protein A	A. johnsonii XBB1	85	100% (ALV71632.1)
13	feoB	9.9	11.729	+	Ferrous iron transport protein B	A. johnsonii XBB1	609	99% (ALV71631.1)
14	acr3	12.808	11.852	-	Arsenical-resistance protein ACR3	Acinetobacter spp.	318	99% (WP_004665958.1)
15	orfA	12.895	13.257	+	Mobile element protein	Acinetobacter spp.	105	100% (WP_002045130.1)
16	orfB	13.257	14.174	+	Mobile element protein	A. indicus IHIT33295	321	97% ( WP_104495087.1)
17	cusF	14.732	14.367	-	Periplasmic copper- and silver-binding protein CusF	Acinetobacter spp.	121	95% (WP_004726733.1)
18	cusA	17.912	14.766	-	Copper/silver efflux system membrane protein CusA	Acinetobacter spp.	1048	98% (WP_000561666.1)
19	cusB	19.425	17.926	-	Copper/silver efflux system membrane fusion protein CusB	Acinetobacter spp.	499	99% (WP_000945694.1)
20	cusC	20.444	19.425	-	Copper/silver efflux system, outer membrane component CusC	Acinetobacter spp.	339	96% (WP_005079043.1)
21	hipA	22.343	21.078	-	HipA toxin of the HipAB TA system	Acinetobacter spp.	421	100% (WP_000934717.1)
22	hipB	22.648	22.343	-	HipB antitoxin of the HipAB TA system	Acinetobacter spp.	101	100% (WP_000366814.1)
23	orf23	23.825	23.568	-	Hypothetical protein	Acinetobacter spp	85	100% (WP_004726728.1)
24	fic	24.771	24.175	-	Fic toxin of the YhfG-Fic TA system	Acinetobacter spp	198	100% (WP_004826955.1)
25	yhfG	24.951	24.784	-	YhfG antitoxin of the YhfG-Fic TA system	Acinetobacter spp	55	100% (WP_002125865.1)
26	orf26	25.706	28.045	+	Hypothetical protein	A. ursingii UMB1319	779	100% (PMC95142.1)
27	int	28.05	31.25	+	Site-specific Integrase	Acinetobacter spp	1066	100% (WP_017396129.1)
28	orf28	31.796	31.578	-	Hypothetical protein	Acinetobacter spp	72	100% (WP_004826949.1)
29	umuC	33.096	31.801	-	Error-prone, lesion bypass DNA polymerase V (UmuC)	Acinetobacter spp	431	100% (WP_004826947.1)
30	umuD	33.737	33.111	-	Error-prone repair protein (UmuD)	Acinetobacter spp	208	100% (WP_004826946.1)
31	yedK	34.49	33.849	-	SOS-response-asociated peptidase	Acinetobacter spp	213	100% (WP_002046584.1)
32	irrE	35.843	34.737	-	Transcriptional regulator, XRE family	Acinetobacter spp	368	100% (WP_000482094.1)
33	orf33	36.566	35.856	-	Hypothetical protein	Acinetobacter spp	236	100% (WP_001052588.1)
34	fadB	37.591	39.744	+	Fatty acid oxidation complex subunit alpha FadB	A. ursingii UMB1319	717	100% (PMC95251.1)
35	fadA	39.757	40.929	+	Acetyl-CoA C-acyltransferase FadA	A. ursingii UMB1319	390	100% (PMC95250.1)
36	orf36	42.332	41.79	-	Hypothetical protein	A. lwoffii ED23-35	180	100% (APW48797.1)
37	yciW	42.997	42.443	-	Alkylhydroperoxidase family enzyme	Acinetobacter spp	184	99% (WP_043971153.1)
38	orf38	43.835	45.046	+	Hypothetical protein	Acinetobacter spp	424	100% (WP_005006246.1)
39	araC	46.026	45.091	-	Transcriptional regulator, AraC family	Acinetobacter spp	311	100% (WP_005006248.1)
40	msrA	46.239	46.637	+	Methionine-S-sulfoxide reductase, MsrA	Acinetobacter spp	162	100% (WP_005006250.1)
41	grxC-like	46.665	46.901	+	Glutaredoxin	Acinetobacter spp	78	100% (WP_005006251.1)
42	selR	46.933	47.373	+	Methionine-R-sulfoxide reductase, SelR	Acinetobacter spp	146	100% (WP_005006253.1)
43	msrA-like	47.602	48.264	+	Methionine-S-sulfoxide reductase, MsrA-like	Acinetobacter spp	220	100% (WP_005028456.1)
44	orf44	49.423	48.452	-	Hypothetical protein	A. ursingii UMB1319	323	100% (PMC95242.1)
45	orf45	50.194	49.793	-	Bona fide RidA/YjgF/TdcF/RutC subgroup	Acinetobacter spp	133	100% (WP_005028450.1)
46	tnpA	51.054	50.353	-	Mobile element protein	Acinetobacter spp	233	100% (WP_005005861.1)
47	orf47	51.58	52.293	+	Phosphoribosyl transferase domain containing protein	Acinetobacter spp	237	100% (WP_001986287.1)
48	int	52.687	53.886	+	Site-specific recombinase, phage integrase family	Acinetobacter spp	399	100% (WP_000059658.1)
49	hicB	54.016	54.141	+	HicB antitoxin of the HicAB TA system	Acinetobacter spp, Enterobacter sp. Ni15	73	100% (WP_001986288.1)
50	nrpA	54.654	54.394	-	Nickel resistance protein NrpA	Acinetobacter spp	86	100% (WP_017396126.1)
51	nrpB	54.84	55.061	+	Transcriptional regulator NrpB for the nickel resistance response	Acinetobacter spp	73	100% (WP_004658364.1)
52	orfA	55.472	55.708	+	Mobile element protein	A. pittii ANC 3678	78	100% (WP_080631238.1)
53	orfB	55.829	55.966	+	Mobile element protein	Acinetobacter sp. 1289694	45	100% (EXA84446.1)
54	cadR	56.62	56.213	-	Transcriptional regulator CadR	Acinetobacter spp.	135	99% (WP_001219642.1)
55	cadA	56.716	57.612	+	Cobalt-zinc-cadmium resistance protein	Acinetobacter spp.	298	100% (WP_009392494.1)
56	ΔlspA	57.718	58.101	+	Lipoprotein signal peptidase	Acinetobacter spp.	161	100% (WP_004827041.1)
57	tnpA	58.129	59.061	+	Mobile element protein	Acinetobacter spp.	310	99% (WP_000743262.1)
58	orf58	59.261	59.59	+	Hypothetical protein	Acinetobacter spp.	109	99% (WP_004827037.1)
59	orf59	59.937	60.422	+	Hypothetical protein	Acinetobacter spp.	161	100% (WP_004827035.1)
60	orf60	60.379	61.593	+	Hypothetical protein	A. bereziniae NIPH 3	404	100% (ENV23844.1)
61	orf61	62.145	63.377	+	ATPase component BioM of energizing module of biotin ECF transporter	Acinetobacter spp.	410	100% (WP_001255534.1)
62	orf62	63.978	63.649	-	Serine protease	Acinetobacter spp.	109	100% (WP_000506885.1)
63	yafY	64.22	65.053	+	WYL domain-containing protein	Acinetobacter spp.	288	100% (WP_004827030.1)
64	brxA	65.064	65.675	+	BREX-1 system inner membrane protein BrxA	Acinetobacter spp.	203	100% (WP_000892996.1)
65	brxB	65.692	66.267	+	BREX-1 system cytoplasmic protein BrxB	Acinetobacter spp.	201	100% (WP_004281985.1)
66	brxC	66.308	69.988	+	BREX-1 system P-loop protein BrxC	Acinetobacter spp.	1226	98% (WP_001021842.1)
67	pglX	70.035	73.523	+	BREX-1 system adenine-specific DNA-methyltransferase PglX	A. ursingii UMB1319	1162	99% (PMC96553.1)
68	pglZ	73.567	76.191	+	BREX-1 system phosphatase PglZ	Acinetobacter spp.	874	98% (WP_005071458.1)
69	brxL	76.221	78.26	+	BREX-1 system Lon protease-like protein BrxL	Acinetobacter spp.	679	100% (WP_004827020.1)
70	ΔtnpA	78.585	78.361	-	Mobile element protein	A. junii SH205, A. bereziniae NIPH 3	74	100% (WP_004827017.1)
71	orf71	79.528	78.818	-	Hypothetical protein	Acinetobacter spp.	236	100% (WP_004827016.1)
72	orf72	80.232	79.51	-	Hypothetical protein	Acinetobacter spp.	240	100% (WP_004827012.1)
73	marR	80.876	80.229	-	MarR family transcriptional regulator	Acinetobacter spp.	215	100% (WP_004827010.1)
74	higA2	81.696	81.424	-	HigA2 antitoxin of the type II TA system	Acinetobacter spp.	90	100% (WP_000369781.1)
75	higB2	82.009	81.689	-	HigB2 toxin of the type II TA system	Acinetobacter spp.	106	100% (WP_058971762.1)
76	orf76	82.176	82.436	+	Hypothetical protein	A. ursingii UMB1319	86	100% (PMC96545.1)
77	orf77	82.575	82.889	+	Hypothetical protein	Acinetobacter spp.	104	100% (WP_058971764.1)
78	tnpA	83.442	84.773	+	Mobile element protein	A. ursingii UMB1319	439	100% (PMC96541.1)
79	ΔtnpA	85.025	84.888	-	Mobile element protein	A. baumannii AC002	45	100% (PCN85022.1)
80	sdhC	85.123	85.497	+	Succinate dehydrogenase cytochrome b-556 subunit	Acinetobacter spp.	124	100% (WP_005005993.1)
81	grxC	87.415	87.143	-	Glutaredoxin 3	Acinetobacter spp.	90	100% (WP_005005995.1)
82	fnr	88.615	87.869	-	Flavodoxin reductases (ferredoxin-NADPH reductases) family 1	Acinetobacter spp.	248	100% (WP_002118292.1)
83	yuiH	89.255	88.608	-	Sulfite oxidase and related enzymes	A. nosocomialis WC-487	215	100% (EKU58237.1)
84	orf84	89.678	90.148	+	Thiol-disulfide isomerase	P. aeruginosa HIAE_PA13	156	100% (PTZ28688.1)
85	orf85	91.257	90.826	-	Heme-binding protein	K. pneumoniae MGH90	146	99% (KMG76643.1)
86	qor5	92.343	91.33	-	Bifunctional protein: zinc-containing alcohol dehydrogenase; quinone oxidoreductase (NADPH:quinone reductase)	Acinetobacter spp.	337	100% (WP_002118279.1)
87	orf87	92.419	92.586	+	Hypothetical protein	Acinetobacter sp. 694762	55	100% (EXI09684.1)
88	corA	93.759	92.791	-	Magnesium and cobalt transport protein CorA	Acinetobacter spp.	322	100% (WP_011979111.1)
89	gstA	94.46	93.756	-	Glutathione S-transferase	Acinetobacter spp.	234	100% (WP_003464969.1)
90	msrA2	95.14	94.601	-	Methionine-S-sulfoxide reductase, MsrA2	Acinetobacter spp.	179	100% (WP_003464967.1)
91	selR-like	95.585	95.142	-	Methionine-R- sulfoxide reductase, SelR-like	Acinetobacter spp.	147	100% (WP_003464965.1)
92	orfA	96.909	96.106	-	Accessory transposition gene	Acinetobacter spp.	267	100% (WP_010454871.1)
93	orfB	98.392	96.902	-	Mobile element protein	Acinetobacter spp.	499	100% (WP_024012635.1)
94	traM	99.024	98.59	-	IncP-type DNA transfer protein TraM	Uncultured bacterium pQKH54	144	96% (CAJ43281.1)
95	traL	99.761	99.036	-	IncP-type DNA transfer protein TraL	Uncultured bacterium pQKH54	241	97% (CAJ43361.1)
96	traK	100.189	99.761	-	IncP-type oriT binding protein TraK	Uncultured bacterium pQKH54	142	91% (CAJ43360.1)
97	traJ	100.535	100.891	+	IncP-type oriT binding protein TraJ	Uncultured bacterium pQKH54	118	98% (CAJ43359.1)
98	ΔtraI	100.926	103.001	+	IncP-type DNA relaxase TraI	Uncultured bacterium pQKH54	691	92% (CAJ43356.1)
99	ΔtnpA	103.065	103.211	+	Mobile element protein	Acinetobacter spp.	48	100% (WP_005028587.1)
100	tnpA	103.208	104.14	+	Mobile element protein	Acinetobacter spp.	310	99% (WP_002114401.1)
101	gshR	105.688	104.336	-	Glutathione reductase	Acinetobacter spp.	450	100% (WP_002122354.1)
102	ΔtnpA	106.399	105.767	-	Mobile element protein	A. radioresistens 50v1	228	100% (PKD86752.1)
103	orfA	106.505	107.074	+	Mobile element protein	Acinetobacter sp. LCT-H3	189	100% (OIJ35007.1)
104	orfB	107.161	107.595	+	Mobile element protein	Acinetobacter spp.	144	100% (WP_000780881.1)
105	higB	108.242	108.436	+	HigB toxin of the HigAB TA system	Acinetobacter spp.	118	100% (WP_004668307.1)
106	higA	108.429	108.731	+	HigA antitoxin of the HigAB TA system	Acinetobacter spp.	100	100% (WP_001140620.1)
107	tnpA	108.852	110.003	+	Mobile element protein	A. ursingii UMB1319	383	100% (WP_058971770.1)
108	ΔtnpA	110.378	110.764	+	Mobile element protein	A. baumannii ACM-14	128	99% (WP_107681061.1)
109	ΔphoA	111.604	110.768	-	Alkaline phosphatase	A. ursingii UMB1319, A. nosocomialis 2010S01-197	278	100% (WP_043972776.1)
110	parB	112.652	111.753	-	Partitioning protein ParB	Acinetobacter spp.	299	99% (WP_016165153.1)
111	parA	113.447	112.671	-	Partitioning protein ParA	Acinetobacter spp.	258	100% (WP_004942653.1)
aThe BlastP algorithm was used to search for protein similarities in GenBank databases. The criteria used to define amino acid sequence homology to those indicated by the corresponding accession numbers was the BlastP best hit at the NCBI databases.

## Sheet: pAbe229-15
Order	Gene/Feature	Location (nucleotide)		DNA strand	Closest BlastP-match in NCBI databases
					Assigned function	Microorganism and/or plasmid	Subject protein
		Start	Stop				Length (amino acid residues)	Amino acid identitya (accession number)
1	repB	501	1.388	+	Initiator replication protein	Acinetobacter spp.	295	100% (WP_012780181.1)
2	orf2	1.465	2.022	+	Hypothetical protein	pAB-ML, A. baumannii	185	97% (AKT73129.1)
3	yddG	3.125	2.22	-	Drug/metabolite transporter (DMT) superfamily permease	p2ZQ4, A. baumannii	301	97% (PST50000.1)
4	proP	4.43	3.138	-	L-Proline/Glycine betaine transporter ProP	A. calcoaceticus/ A. baumannii complex	430	99% (WP_000794338.1)
5	cre	5.726	4.488	-	Creatinase	Acinetobacter spp.	412	100% (WP_001094922.1)
6	glxA	6.802	5.843	-	Transcriptional regulator containing an amidase domain and an AraC-type DNA-binding HTH domain	A. nosocomialis	322	100% (OID34742.1)
7	higA2	7.65	7.378	-	HigA2 antitoxin of the TA system	Acinetobacter spp.	90	100% (WP_000369780.1)
8	higB2	7.963	7.643	-	HigB2 toxin of the TA system	A. baumannii JX101	105	99% (PUV04638.1)
9	orf9	8.347	8.15	-	Hypothetical protein	Acinetobacter spp.	65	100% (WP_000476222.1)
10	orf10	8.641	8.414	-	Hypothetical protein	Acinetobacter spp.	75	99% (WP_000921865.1)
11	cspE	8.954	8.739	-	Cold shock protein CspE	Acinetobacter spp.	71	100% (WP_000071892.1)
12	orf12	9.8	10.186	+	Hypothetical protein	A. bereziniae CHI-40-1	128	99% (WP_042088600.1)
13	orf13	10.349	10.858	+	Hypothetical protein	A. pittii UKK-0538	170	86% (OCY73692.1)
14	orf14	12.725	11.25	-	Hypothetical protein	A. pittii UKK-0538	491	97% (OCY73691.1)
15	orf15	13.121	13.879	-	Hypothetical protein	pMMCU1, A. calcoaceticus	252	100% (YP_003090211)
16	mobA	14.183	15.352	+	MobA/MobL family protein	Acinetobacter spp	389	100% (WP_012846858.1)
aThe BlastP algorithm was used to search for protein similarities in GenBank databases. The criteria used to define amino acid sequence homology to those indicated by the corresponding accession numbers was the BlastP best hit at the NCBI databases.

## Sheet: pAbe229-9
Order	Gene/Feature	Location (nucleotide)		DNA strand	Closest BlastP-match in NCBI databases
					Assigned function	Microorganism and/or plasmid	Subject protein
		Start	Stop				Length (amino acid residues)	Amino acid identitya (accession number)
1	repB	501	1.436	+	Initiator replication protein	A. pittii PR331	311	100% (OTM21916.1)
2	orf2	1.467	2.051	+	Hypothetical protein	Acinetobacter sp. 243_ASPC	182	100% (WP_048766125.1)
3	secC	3.055	2.258	-	Zinc chelation protein SecC	A. ursingii blaTEM-116	279	99% (PPZ93229.1)
4	orf4	3.566	3.069	-	Hypothetical protein	A. ursingii blaTEM-116	165	100% (PPZ93230.1)
5	splT	3.848	4.144	+	SplT toxin of the TA system	A. johnsonii SH046	98	100% (EEY94869)
6	splA	4.137	4.445	+	SplA antitoxin of the TA system	Acinetobacter spp.	104	100% (WP_005331448.1)
7	orf7	4.528	4.863	+	Hypothetical protein	A. baumannii ABBL059, A. pittii St-14379-92	111	100% (WP_032866032.1)
8	orf8	4.907	5.092	+	Hypothetical protein	Acinetobacter spp.	59	100% (WP_001231652.1)
9	doc	5.095	5.475	+	Orphan toxin gene of a type II TA system	Acinetobacter spp.	128	100% (WP_000053135.1)
10	ymdB	6.028	5.477	-	O-acetyl-ADP-ribose deacetylase	Acinetobacter spp.	183	100% (WP_005401799.1)
11	orf11	6.765	6.037	-	Hypothetical protein	A. baumannii ABBL059, A. pittii St-14379-92	232	100% (WP_057692832.1)
12	orf12	7.644	6.883	-	Hypothetical protein	A. pittii PR331	253	100% (OTM21914.1)
13	mobA	7.948	9.12	+	MobA/MobL family protein	Acinetobacter sp. 243_ASPC	390	100% (WP_048765066.1)
aThe BlastP algorithm was used to search for protein similarities in GenBank databases. The criteria used to define amino acid sequence homology to those indicated by the corresponding accession numbers was the BlastP best hit at the NCBI databases.

## Sheet: pAbe229-4
Order	Gene/Feature	Location (nucleotide)		DNA strand	Closest BlastP-match in NCBI databases
					Assigned function	Microorganism and/or plasmid	Subject protein
		Start	Stop				Length (amino acid residues)	Amino acid identitya (accession number)
1	orf1	1217	714	-	DNA-binding protein	A. venetianus LUH5627	167	95% (KXZ63025.1)
2	orf2	1518	1721	-	Hypothetical protein	A. parvus NIPH 1103	67	96% (ENU34776.1)
3	relE	2080	1748	-	RelE toxin of the RelEB TA system	Acinetobacter sp. CIP 102129	110	98% (ENU87589.1)
4	relB	2333	2052	-	RelB antitoxin of the RelEB TA system	Acinetobacter sp. WCHA60	93	97% (WP_068975482.1)
5	orf5	2423	2737	+	Hypothetical protein	Candidatus Buchananbacteria RBG_13_36_9	104	44% (OGY42406.1)
6	rimI	3722	3096	-	GNAT family N-acetyltransferase	A. pittii YMC2010/8/T347	208	59% (AQV14548.1)
7	orf7	3885	3688	-	Hypothetical protein	A. pittii YMC2010/8/T348	65	66% (WP_078219821.1)
aThe BlastP algorithm was used to search for protein similarities in GenBank databases. The criteria used to define amino acid sequence homology to those indicated by the corresponding accession numbers was the BlastP best hit at the NCBI databases.

## Sheet: pAbe229-1
Order	Gene/Feature	Location (nucleotide)		DNA strand	Closest BlastP-match in NCBI databases
					Assigned function	Microorganism and/or plasmid	Subject protein
		Start	Stop				Length (amino acid residues)	Amino acid identitya (accession number)
1	orf1	56	220	+	Hypothetical protein	Acinetobacter sp. ACNIH2	54	50% (AUX87537.1)
2	orf2	893	1.105	+	Hypothetical protein	Chlamydia trachomatis H17IMS	70	53% (CRH77953.1)
aThe BlastP algorithm was used to search for protein similarities in GenBank databases. The criteria used to define amino acid sequence homology to those indicated by the corresponding accession numbers was the BlastP best hit at the NCBI databases.
