# Supplementary material for: Characterization of the diverse plasmid pool harbored by the blaNDM-1-containing Acinetobacter bereziniae HPC229 clinical strain
Source: PLoS One. 2019 Nov 19;14(11):e0220584. doi: 10.1371/journal.pone.0220584 (PMC6863613; doi:10.1371/journal.pone.0220584)
Supplement: S3 Table — (XLSX) [file pone.0220584.s004.xlsx]

## Sheet: Sheet1
S3 Table. A. bereziniae plasmids initiator replication proteins classification
A. bereziniae HPC229 plasmid	Query gene accesion number	Query protein superfamily	% Identity (cut off=70)	E value	Bit score	Subject protein accession number	Subject plasmid	Species	Groupa
pAbe229-114	NDM229_021580	Rep_3	99.74	0.0	798	WP_004637173.1	pXBB1-8	A. johnsonnii	AR3G4
	NDM229_021580	Rep_3	99.23	0.0	795	YP_009070446.1	pMS32-1	A. pittii
	NDM229_021580	Rep_3	99.23	0.0	795	WP_000064928.1	p3ABAYE	A. baumannii
							pXM2	A. calcoaceticus
							p6411-89.111	A. nosocomialis
	NDM229_021580	Rep_3	98.72	0.0	791	YP_009070355.1	pM131-2	Acinetobacter sp.
	NDM229_021580	Rep_3	98.72	0.0	791	WP_005155758.1	pAV3b	A. venetianus
	NDM229_021580	Rep_3	73.72	0.0	588	WP_000140303.1	pD36-4b	A. baumannii
pAbe229-15	NDM229_022170	Rep_3	100.00	0.0	603	YP_006961790.1	pMMD	A. baumannii	AR3GR3
	NDM229_022170	Rep_3	100.00	0.0	603	YP_003293957.1	pMMCU2	A. baumannii
	NDM229_022170	Rep_3	100.00	0.0	603	YP_003090213.1	pMMCU1	A. calcoaceticus
	NDM229_022170	Rep_3	95.25	0.0	571	YP_001736296.1	pABIR	A. baumannii
	NDM229_022170	Rep_3	89.19	0.0	546	CAP02944.1	p2ABSDFb	A. baumannii
	NDM229_022170	Rep_3	86.78	0.0	526	WP_005804946.1	pCMC8300b	A. baumannii
							pABUH3b-7.8	A. baumannii
							pABUH3a-8.2	A. baumannii
	NDM229_022170	Rep_3	76.11	8e-171	472	WP_000987942.1	pNaval17-13	A. baumannii
							pNaval81-13	A. baumannii
	NDM229_022170	Rep_3	76.45	2e-170	471	WP_058952636.1	pXBB1-3	A. johnsonii
	NDM229_022170	Rep_3	75.43	3e-168	466	CAP02992.1	p3ABSDFb	A. baumannii
pAbe229-9	NDM229_022255	Rep_3	85.16	0.0	549	YP_001661463.1	pAV1	A. venetianus	AR3G6
	NDM229_022255	Rep_3	85.16	0.0	548	WP_006582659.1	pXBB1-5	A. johnsonii
A. bereziniae strains	Query protein accesion nº	Query protein superfamily	% Identity	E value	Bit score	Subject protein accession nº	Subject plasmid	Species	Groupa
Ag2	WP_046759477.1	Rep_3	60.00	7e-133	377	YP_009068008.1	pMS32-3	A. pittii	AR3G13
NIPH3	WP_002046604.1	Rep_3	100.00	0.0	640	WP_002046604.1	pAV3b	A. venetianus	AR3G9
WC-743	WP_009586662.1	Rep_3	80.65	0.0	521	YP_009067182.1	pM131-8	Acinetobacter sp.	AR3G8
KCTC 23199	WP_010591570.1	pfam03090	-	-	-	-	-	-	-
CIP 70.12/KCTC 23199	WP_000743064.1	RepC	100.00	0.0	602	WP_000743064.1	pAB3	A. baumannii	ARCG1c
	WP_004889343.1	Rep_3	78.62	5e-177	489	WP_000786839.1	pD36-4b	A. baumannii	AR3G9
507_ABAU	WP_005320426.1	Rep_3	66.80	1e-119	345	WP_001205341.1	pXBB1-4	A. johnsonii	AR3G1.1
	WP_005804946.1	Rep_3	100.00	0.0	597	WP_005804946.1	pCMC8300b	A. baumannii	AR3G3
							pABUH3b-7.8	A. baumannii
							pABUH3a-8.2	A. baumannii
	WP_032049727.1	Rep_3	85.16	0.0	543	WP_002124966.1	II(CIP70.10)	A. baumannii	AR3G1.4
							II(R2091)	A. baumannii
	WP_049044560.1	Rep_3	80.13	0.0	506	WP_049068997.1	pXBB1-9	A. johnsonii	AR3G15
CHI-40-1	WP_002011663.1	Rep_3	97.78	0.0	642	WP_001208779.1	pIS123-12	A. baumannii	AR3G1.2
							pNaval81-26b	A. baumannii
	WP_042090107.1	Rep_3	96.09	0.0	602	YP_001661474.1	pAV2	A. venetianus	AR3G11
	WP_005021644.1	Rep_3	83.87	0.0	534	WP_002124966.1	II(CIP70.10)	A. baumannii	AR3G1.4
							II(R2091)	A. baumannii
	WP_004856439.1	Rep_3	96.08	0.0	586	CAP02936.1	p1ABSDF	A. baumannii	AR3G5
	WP_004282236.1	Rep_3	100.00	0.0	648	WP_004282236.1	pABUH2b-5.4	A. baumannii	AR3G2
	WP_026441244.1	Rep_3	98.34	0.0	613	WP_050049564.1	p6411-66.409b	A. nosocomialis	AR3G12
	WP_039048370.1	Rep_3	99.68	0.0	639	WP_002046604.1	pAV3b	A. venetianus	AR3G9
aAcinetobacter Rep_3 Groups according to Salto et al. [30].
b Plasmids encoding multiple replication initiation proteins.
cNovel classification proposed in this work.
