# Supplementary material for: Characterization of the diverse plasmid pool harbored by the blaNDM-1-containing Acinetobacter bereziniae HPC229 clinical strain
Source: PLoS One. 2019 Nov 19;14(11):e0220584. doi: 10.1371/journal.pone.0220584 (PMC6863613; doi:10.1371/journal.pone.0220584)
Supplement: S4 Table — (XLSX) [file pone.0220584.s005.xlsx]

## Sheet: Sheet1
S4 Table. Plasmid relaxases used in this work
Organism	Plasmid or strain, contig namea	Plasmid or contig accesion number	Protein accesion number	Relaxase classificationb
Escherichia coli	pMG828-4	DQ995354.1	ABJ16463.1	MOBQ1
Escherichia coli	pIGJC156	EU090225.1	ABU79841.1
Pelobacter propionicus	pPRO2	NC_008608.1	WP_011733934.1
Salmonella enterica subsp. enterica serovar Typhimurium	pSC101	NC_002056.1	NP_044284.1
Acinetobacter baumannii	pAB14	EF059914.1	ABN41468.1
Actinobacillus pleuropneumoniae	p11745	DQ176855.1	ABA71358
Neisseria meningitidis	pAB6	AF126482.1	AAD31795.1
Neisseria gonorrhoeae	pSJ7.4	AY221996.1	AAO45530.1
Acinetobacter baumannii	pMAC	AY541809.1	AAT09659.1
Acinetobacter sp.	pIH8	-	-
Acinetobacter sp.	C230	-	-
Acinetobacter sp.	C127	-	-
Acinetobacter venetianus	pAV2	DQ278486.1	ABC47684.1
Acidithiobacillus caldus	pTcM1	EU421841.2	ACA00179.1
Escherichia coli	RSF1010	X04830.1	CAA28520.1
Dichelobacter nodosus	pDN1	NC_002636.1	NP_073212.1
Pasteurella multocida	pCCK381	NC_006994.1	YP_232869.1
Uncultured bacteria	pIE1115	NC_002524.1	NP_065281.1
Actinobacillus pleuropneumoniae	pMS260	AB109805.1	BAD07019.1
Uncultured bacteria	pIE1130	AJ271879	CAB75594.1
Pasteurella multocida	pVM111	AJ514834.1	CAD55845.1
Acinetobacter bereziniae	pNDM229	NZ_KT072713.1	WP_004993230.1
Acinetobacter bereziniae	pAbe229-9	CM012186.1	WP_048765066.1
Acinetobacter bereziniae	pAbe229-15	CM012184.1	WP_012846858.1
Salmonella enterica subsp. enterica serovar Enteritidis	pP	AY079199	AAL87010.1
Acinetobacter bereziniae	CHI-40-1, contig176	CDEL01000176	CEI52583.1
Acinetobacter bereziniae	pNDM-40-1	KF702385.1	AHF22521.1
Acinetobacter bereziniae	CHI-40-1, contig201	CDEL01000201	CEI53367.1
Acinetobacter bereziniae	507_ABAU, 1343_5638_331075	NZ_JVEK01000173	WP_004698297
Rhizobium etli	p42d	NC_004041	WP_011053391.1	MOBQ2
Agrobacterium tumefaciens	pTiC58	AF010180	AAC17212.1
Streptococcus sp.	pIP501	L39769.1	AAA99466.1	MOBQ3
Lactobacillus salivarius	pSF118-20	AF488831	AAQ06295.1
Acinetobacter sp.	pIH6	-	-	MOBQAci
Acinetobacter sp.	pIH7	-	-
Acinetobacter sp.	pIH16	-	-
Acinetobacter sp.	C159	-	-
Acinetobacter sp.	C161	-	-
Acinetobacter sp.	C188	-	-
Acinetobacter baumannii	p1ABAYE	NC_010401	WP_005199240.1
Acinetobacter bereziniae	CHI-40-1, contig211	CDEL01000211	CEI53380.1
Acinetobacter bereziniae	CHI-40-1, contig143	CDEL01000143	CEI52088.1
Acinetobacter bereziniae	CHI-40-1, contig292	CDEL01000292	CEI54534.1
Acinetobacter bereziniae	WC-743, deg7180000004425	AMFQ01000130	ELW78751.1
aPlasmids indicated in bold were sequenced by Salto et al. [30].
bAccording to the phylogenetic tree shown in Fig 3.
