# Supplementary material for: Characterization of the diverse plasmid pool harbored by the blaNDM-1-containing Acinetobacter bereziniae HPC229 clinical strain
Source: PLoS One. 2019 Nov 19;14(11):e0220584. doi: 10.1371/journal.pone.0220584 (PMC6863613; doi:10.1371/journal.pone.0220584)
Supplement: S5 Table — (XLSX) [file pone.0220584.s006.xlsx]

## Sheet: genomes
S5 Table. Characteristics of A. bereziniae strains used in this work, and A. guillouiae and A. gerneri reference strains
Strain	Host	Collection date	Country	Isolation source	Size (Mb)	GC%	Genes	Proteins	Scaffolds	Level	WGS	BioSample	BioProject	Assembly	ANIa	Group/SubGroup
A. bereziniae HPC229	Homo sapiens	2014	Argentina	Blood	4.63	38.0	4429	4129	122	Contigs	LKDJ01	SAMN04115377	PRJNA297113	GCA_001500155.2	98.20	Proteobacteria/ Gammaproteobacteria
A. bereziniae CHI-40-1		2005	India	Pus	4.77	38.0	4542	4306	324	Scaffold	CDEL01	SAMEA2779767	PRJEB7120	GCA_000825165.1	98.11
A. bereziniae CIP 70.12T		1960	-	Wound	5.02	38.3	4791	4540	3	Scaffold	APQG01	SAMN01087834	PRJNA183276	GCA_000368925.1	100.00
A. bereziniae NIPH 3		1991	Czech Republic	Hospital environment	4.97	38.0	4663	4426	12	Scaffold	APPK01	SAMN01087916	PRJNA183301	GCA_000368505.1	97.90
A. bereziniae 507_ABAU		2012	United States	Sputum	4.80	37.8	4541	4347	278	Scaffold	JVEK01	SAMN03197700	PRJNA267549	GCA_001055215.1	98.05
A. bereziniae KCTC 23199		1960	Sweden	Wound	4.86	38.0	4667	4494	132	Contigs	BBLJ01	SAMD00018636	PRJDB1754	GCA_000753985.1	99.96
A. bereziniae XH901		2016	China	Blood	4.50	38.1	4277	4051	1	Complete genome	-	SAMN06066181	PRJNA355181	GCA_002813045.1	98.24
Acinetobacter sp. WC-743		2008	United States	Hospital environment	4.9	37.9	4692	4387	154	Contigs	AMFQ01	SAMN00761217	PRJNA53455	GCA_000335555.1	98.06
Acinetobacter sp. Ag2	Anopheles gambiae	2014	United States	Adult mosquito gut	4.43	37.9	4174	4002	59	Contigs	LBNA01	SAMN03565819	PRJNA282043	GCA_001005515.1	98.28
A. guillouiae CIP 63.46T	Homo sapiens	1951	-	Sewage water	4.9	38.2	4487	4675	16	Scaffold	APOS01	SAMN01828179	PRJNA183319	GCA_000368145.1	82.72
A. gerneri DSM 14967T		1991	Australia	Sewage water	4.59	37.9	4097	4305	42	Scaffold	APPN01	SAMN01087849	PRJNA183298	GCA_000368565.1	76.05
aANI calculations were performed using strain CIP70.12 as reference (see Materials and Methods).
