# Supplementary material for: Characterization of the diverse plasmid pool harbored by the blaNDM-1-containing Acinetobacter bereziniae HPC229 clinical strain
Source: PLoS One. 2019 Nov 19;14(11):e0220584. doi: 10.1371/journal.pone.0220584 (PMC6863613; doi:10.1371/journal.pone.0220584)
Supplement: S6 Table — (XLSX) [file pone.0220584.s007.xlsx]

## Sheet: Sheet1
S6 Table. XerC/XerD sites present in A. bereziniae genomes
Strain	Accession number	Start	End	Strand	Sequencea	Total XerC/D sites with cr6
XH901	NZ_CP018259.1	2,252,203	2,252,230	+	ATTTCGCATAATGTATATTATGTTAAAT	1
CIP 70.12	NZ_KB849756.1	2,472,881	2,472,908	+	ACTTCGTATAAGAGATTTTATGTTAAAT	2
	NZ_KB849756.1	2,475,090	2,475,117	-	ATTTCGTATAAGGCGTATTATGTTAATT
NIPH 3	NZ_KB849462.1	87.353	87.38	+	ATTTCGTATAACGTGTATTATGTTAATT	2
	NZ_KB849468.1	404.186	404.213	-	ATTTCGTATAATATATATTATGTTAAAT
KCTC 23199	NZ_BBLJ01000039.1	16	43	+	ATTTCGCATAATGTATATTATGTTAAAT	3
	NZ_BBLJ01000015.1	15	42	+	ATTTCGTATAAGGCGTATTATGTTAATT
	NZ_BBLJ01000015.1	2.224	2.251	-	ACTTCGTATAAGAGATTTTATGTTAAAT
WC-743	NZ_AMFQ01000112.1	6.049	6.076	+	ATTTCGCATAATGTATATTATGTTAAAT	4
	NZ_AMFQ01000126.1	4.898	4.925	-	ATTTCGTATAAGAGTTTTTATGTTAAAT
		35.473	35.5	-	ATTTCGTATAAGGTGTATTATGTTAATT
	NZ_AMFQ01000149.1	3.033	3.06	+	ATTTCGCATAATAGTCATTATGTTAAAT
Ag2	NZ_LBNA01000011.1	2.435	2.462	+	ACTTCGCATAACGCCCATTATGTTAAAT	5
		7.784	7.811	+	ATTTCGTATAAGCTGTATTATGTTAATT
		1.458	1.485	-	TTTTCTCATAAGAGATTTTATGTTAAAT
	NZ_LBNA01000051.1	162.725	162.752	-	ATTTCGCATAATGTATATTATGTTAAAT
	NZ_LBNA01000007.1	4.058	4.085	+	ATTTCGCATAACGTGCATTATGTTAATT
507_ABAU	NZ_VEK01000173.1	5.607	5.634	+	ATTTCGTATAAGGTGTATTATGTTAATT	7
		5	32	-	ATTTCGCATAAGGTGTATTATGTTAATT
	NZ_JVEK01000215.1	5.884	5.911	+	ATTTCGCATAATAGTCATTATGTTAAAT
	NZ_VEK01000233.1	4.866	4.893	-	GTTTCGCATAACGCCCATTATGTTAAAT
	NZ_VEK01000235.1	32.348	32.375	-	ACTTCGTATAACCGCCATTATGTTAAAT
	NZ_JVEK01000110.1	13.509	13.536	+	ATTTCGCATAATGTATATTATGTTAAAT
	NZ_VEK01000001.1	1.785	1.812	+	GATTCGTATAAGAGATTTTATGTTAAAT
CHI-40-1	NZ_CDEL01000010.1	30	57	+	GTTTCGCATAACGGCCATTATGTTAAAT	31
		540	567	-	ATTTCGCATAAGGCGTATTATGTTAATT
	NZ_CDEL01000075.1	6	33	-	ATTTCGCATAAGGCGTATTATGTTAATT
	NZ_CDEL01000083.1	443	470	-	ATTTCGTATAACGCCCATTATGTTAAAT
	NZ_CDEL01000088.1	1	28	-	GTTTCGCATAACAGCCATTATGTTAAAT
	NZ_CDEL01000089.1	1.207	1.234	-	ATTTCGCATAAGAGATTTTATGTTAAAT
	NZ_CDEL01000107.1	48	75	-	ATTTCGCATAATGTATATTATGTTAAAT
	NZ_CDEL01000143.1	897	924	+	ATTTCTCATAAGCGCCATTATGTTAAAT
		4.887	4.914	+	ACTTCGTATAAGAGTTTTTATGTTAAAT
		47	74	-	ATTTCGCATAACGCCCATTATGTTAAAT
		1.457	1.484	-	GATTCGCATAAGGCGTATTATGTTAATT
		3.981	4.008	-	GTTTCGCATAAGCGCTATTATGTTAATT
	NZ_CDEL01000195.1	1.945	1.972	+	ATTTCGTATAAGGCGTATTATGTTAATT
		3.573	3.6	+	ACTTCTCATAAGACGTATTATGTTAATT
		2.846	2.873	+	ACTTCTCATAAGCACCATTATGTTAAAT
		4.334	4.361	-	GTTTCGCATAACAGCCATTATGTTAAAT
	NZ_CDEL01000201.1	1.205	1.232	+	AATTCGCATAAGAGATTTTATGTTAAAT
		1	28	-	GTTTCGCATAACGGCCATTATGTTAAAT
		1.934	1.961	-	GCTTCGCATAAGCTGTATTATGTTAATT
	NZ_CDEL01000211.1	103	130	+	AATTCGTATAACGTGTATTATGTTAAGT
	NZ_CDEL01000236.1	30	57	+	GTTTCGCATAACGGCCATTATGTTAAAT
		661	688	-	ATTTCGCATAAGGCGTATTATGTTAATT
	NZ_CDEL01000266.1	1.92	1.947	+	ATTTCGTATAAGGCGTATTATGTTAATT
	NZ_CDEL01000292.1	1.963	1.99	+	ATTTCGTATAACAACCATTATGTTAAAT
	NZ_CDEL01000305.1	1.361	1.388	+	ATTTCGTATAAGGTGTATTATGTTAATT
		1.759	1.786	-	ACTTCGCATAACAACCATTATGTTAAAT
	NZ_CDEL01000312.1	2.079	2.106	+	ATTTCGTATAAGGTGTATTATGTTAATT
	NZ_CDEL01000314.1	884	911	+	ACTTCGCATAACGCCCATTATGTTAATT
		3.592	3.619	+	ATTTCGTATAAGGTGTATTATGTTAATT
		1.526	1.553	-	ATTTCGTATAACCGCCATTATGTTAAGT
	NZ_CDEL01000321.1	3.043	3.07	-	ATTTCGTATAAGGTGTATTATGTTAATT
aThe consensus sequence used to identify XerC/D sites in all A. bereziniae genomes was DHWYCKHATAANNNNNNTTATGTTAADT; D=A/G/T, H=A/C/T, Y=C/T, K=G/T, W=A/T, N=A/T/C/G). In the lower row is shown the frequency plot constructed with all the XerC/D sites found in A. bereziniae genomes, including the HPC229 genome (Table 4). The A. bereziniae consensus site generated was atttCgcATAAggggtaTTATGTTAAaT, …
